# Supplementary material for: Unmet needs of Italian centers for pediatric diabetes care: analysis of a survey among pediatric diabetologists facing the national screening program for Type 1 Diabetes
Source: Springer Nature journal article supplement (doi:10.1186/s13052-025-01854-7), 2025-03-13
Supplement: MOESM1 [file 13052_2025_1854_MOESM1_ESM.pdf]

|                                                  |                                                                |
|--------------------------------------------------|----------------------------------------------------------------|
|                                                  | DATA COMPILAZIONE                                              |
| INFORMAZIONI SUL RESPONSABILE DEL CENTRO         | COGNOME                                                        |
|                                                  | NOME                                                           |
|                                                  | TELEFONO CELLULARE                                             |
|                                                  | EMAIL                                                          |
|                                                  | RUOLO                                                          |
| INFORMAZIONI SULLA STRUTTURA                     | PROVINCIA DI RESIDENZA DEL CENTRO                              |
|                                                  | COMUNE DI RESIDENZA DEL CENTRO                                 |
|                                                  | NOME DELLA STRUTTURA                                           |
|                                                  | TIPOLOGIA DELLA STRUTTURA                                      |
|                                                  | COLLOCAMENTO                                                   |
| INFORMAZIONI SUL PERSONALE DIPENDENTE (IN RUOLO) | NUMERO TOTALE MEDICI OSPEDLIERI CHE OPERANO NEL CENTRO         |
|                                                  | NUMERO TOTALE MEDICI UNIVERSITARI CHE OPERANO NEL CENTRO       |
|                                                  | COGNOME E NOME MEDICO no. 1                                    |
|                                                  | FTE MEDICO no. 1                                               |
|                                                  | COGNOME E NOME MEDICO no. 2                                    |
|                                                  | FTE MEDICO no. 2                                               |
|                                                  | COGNOME E NOME MEDICO no. 3                                    |
|                                                  | FTE MEDICO no. 3                                               |
|                                                  | COGNOME E NOME MEDICO no. 4                                    |
|                                                  | FTE MEDICO no. 4                                               |
|                                                  | COGNOME E NOME MEDICO no. 5                                    |
|                                                  | FTE MEDICO no. 5                                               |
|                                                  | COGNOME E NOME MEDICO no. 6                                    |
|                                                  | FTE MEDICO no. 6                                               |
|                                                  | NUMERO TOTALE INFERMIERI CHE OPERANO NEL CENTRO                |
|                                                  | FTE INFERMIERE no. 1                                           |
|                                                  | FTE INFERMIERE no. 2                                           |
|                                                  | FTE INFERMIERE no. 3                                           |
|                                                  | FTE INFERMIERE no. 4                                           |
|                                                  | FTE INFERMIERE no. 5                                           |
|                                                  | FTE INFERMIERE no. 6                                           |
|                                                  | NUMERO TOTALE DIETISTI CHE OPERANO NEL CENTRO                  |
|                                                  | FTE DIETISTA no. 1                                             |
|                                                  | FTE DIETISTA no. 2                                             |
|                                                  | FTE DIETISTA no. 3                                             |
|                                                  | NUMERO TOTALE PSICOLOGI CHE OPERANO NEL CENTRO                 |
|                                                  | FTE PSICOLOGO no. 1                                            |
|                                                  | FTE PSICOLOGO no. 2                                            |
|                                                  | FTE PSICOLOGO no. 3                                            |
|                                                  | NUMERO TOTALE ALTRI OPERATORI DI RUOLO CHE LAVORANO NEL CENTRO |
|                                                  | RUOLO ALTRO OPERATORE no. 1                                    |
|                                                  | FTE ALTRO OPERATORE no. 1                                      |
|                                                  | RUOLO ALTRO OPERATORE no. 2                                    |
|                                                  | FTE ALTRO OPERATORE no. 2                                      |
|                                                  | RUOLO ALTRO OPERATORE no. 3                                    |
|                                                  | FTE ALTRO OPERATORE no. 3                                      |

|                                     |                                                         |
|-------------------------------------|---------------------------------------------------------|
| <b>PERSONALE A CONTRATTO</b>        | <b>NOME E COGNOME MEDICO no. 1</b>                      |
|                                     | ENTE FINANZIATORE                                       |
|                                     | DURATA CONTRATTO (MESI)                                 |
|                                     | <b>INFERMIERE no. 1</b>                                 |
|                                     | ENTE FINANZIATORE                                       |
|                                     | DURATA CONTRATTO (MESI)                                 |
|                                     | <b>DIETISTA no. 1</b>                                   |
|                                     | ENTE FINANZIATORE                                       |
|                                     | DURATA CONTRATTO (MESI)                                 |
|                                     | <b>PSICOLOGO no. 1</b>                                  |
|                                     | ENTE FINANZIATORE                                       |
|                                     | DURATA CONTRATTO (MESI)                                 |
|                                     | ALTRO                                                   |
|                                     | ENTE FINANZIATORE                                       |
|                                     | DURATA CONTRATTO (MESI)                                 |
| <b>PAZIENTI CON DIABETE IN CURA</b> | <b>NUMERO PZ IN CURA &lt; 6 ANNI</b>                    |
|                                     | NUMERO PZ IN CURA 6 - <12 ANNI                          |
|                                     | NUMERO PZ IN CURA 12 - < 18 ANNI                        |
|                                     | NUMERO PZ IN CURA 18 - <25 ANNI                         |
|                                     | NUMERO PZ IN CURA > = 25 ANNI                           |
|                                     | NUMERO TOTALE PZ CON DT1                                |
|                                     | NUMERO TOTALE PZ CON DT2                                |
|                                     | NUMERO TOTALE PZ CON DIABETE GESTAZIONALE               |
|                                     | NUMERO TOTALE PZ CON ALTRE FORME DI DIABETE             |
| <b>ORGANIZZAZIONE PRESTAZIONI</b>   | <b>QUANTI GIORNI ALLA SETTIMANA E' APERTO IL CENTRO</b> |
|                                     | IL CENTRO FORNISCE RECAPITO TELEFONICO AI PAZIENTI      |
| <b>DIABETE E TECNOLOGIA</b>         | <b>CHI FORNISCE INFORMAZIONI SULLA TECNOLOGIA?</b>      |
|                                     | CHI PROVVEDE ALL'IMPIANTO DELLE IP?                     |
|                                     | CHI PROVVEDE ALL'IMPIANTO DEL CGM?                      |
|                                     | CONTATTO PERSONALE AZIENDE CHE PRODUCONO IP CON PZ      |
|                                     | CONTATTO PERSONALE AZIENDE CHE PRODUCONO CGM            |
